# Supplementary material for: Construction of a quinoline-4-carboxylic ester linked covalent organic framework via Doebner–von Miller reaction
Source: Royal Society of Chemistry journal article supplement (doi:10.1039/d4nj03063j), 2024-01-01
Supplement: d4nj03063j1.pdf [file d4nj03063j1.pdf]

## **Construction of quinoline-4-carboxylic esters linked covalent organic framework *via* Doebner–von Miller reaction**

Yuxing Tong<sup>a,b,c</sup>, Ziwei Wang<sup>a,b,c</sup>, Ben Liu<sup>a,b,c</sup>, Chao Wan<sup>a,b,c</sup>, Cheng Xu<sup>a,b,c</sup>, Huaji Pang<sup>d</sup>, Dekang Huang<sup>d</sup>, Wenlong Zheng<sup>\*d</sup>, Yonggang Xiang<sup>\*d</sup>

[a] China Tobacco Hubei Industrial Co., Ltd., Wuhan 430040, PR China

[b] Hubei Xinye Reconstituted Tobacco Development Co., Ltd., Wuhan 430056, PR China

[c] Applied Technology Research of Reconstituted Tobacco Hubei Province Key Laboratory, Wuhan 430040, PR China

[d] College of Chemistry, Huazhong Agricultural University, Wuhan 430070, PR China.

E-mail: [zhengwenlong@webmail.hzau.edu.cn](mailto:zhengwenlong@webmail.hzau.edu.cn), [ygxian@mail.hzau.edu.cn](mailto:ygxian@mail.hzau.edu.cn)

# Contents

|                                                                      |           |
|----------------------------------------------------------------------|-----------|
| <b>1. General information .....</b>                                  | <b>1</b>  |
| 1.1 Materials .....                                                  | 1         |
| 1.2 Characterization techniques.....                                 | 1         |
| <b>2. Synthetic procedures.....</b>                                  | <b>3</b>  |
| 2.1 Model reaction.....                                              | 3         |
| 2.1.1 Synthesis of methyl-2-phenylquinoline-4-carboxylate.....       | 3         |
| 2.1.2 Synthesis of (L)-menthyl pyruvate .....                        | 3         |
| 2.1.3 Synthesis of (L)-menthyl-2-phenylquinoline-4-carboxylate ..... | 4         |
| 2.2 Synthesis of Im-COFs .....                                       | 4         |
| 2.2.1 Synthesis of Im-COF <sub>F3</sub> .....                        | 4         |
| 2.2.2 Synthesis of Im-COF <sub>G1</sub> .....                        | 5         |
| 2.3 Synthesis of QCE-COFs.....                                       | 5         |
| 2.3.1 Typical synthetic procedure of QCE-COF <sub>F3</sub> -Me.....  | 5         |
| 2.3.2 Synthesis of QCE-COF <sub>F3</sub> -Men .....                  | 6         |
| <b>3. Characterization of COFs .....</b>                             | <b>7</b>  |
| <b>4. Copies of NMR spectra.....</b>                                 | <b>15</b> |
| <b>5. References .....</b>                                           | <b>18</b> |

## 1. General information

### 1.1 Materials

All the chemicals and reagents were purchased in analytical purity from commercial suppliers and used directly without further purification, except that 1,3,6,8-tetrakis(4-aminophenyl)pyrene (Tappy) and <sup>13</sup>C-labeled terephthalaldehyde were synthesized according to the reported procedures.<sup>1,2</sup>

### 1.2 Characterization techniques

<sup>1</sup>H NMR and <sup>13</sup>C NMR were recorded on a Bruker Avance 600 MHz and 151 Hz spectrometers at 298 K, respectively. Chemical shift ( $\delta$ ) was reported in ppm relative to the residual solvent peaks. Peaks were reported as: s = singlet, d = doublet, td = triple doublet, m = multiplet or unresolved, with coupling constants in Hz. Fourier transform infrared (FT-IR) spectra were collected on a Nicolet 6700 spectrometer (Thermo Scientific, USA) equipped with an ATR cell. Powder X-ray diffraction (PXRD) analysis was conducted on a Bruker D8 Advance diffractometer with Cu K $\alpha$  radiation ( $2\theta$  range: 2-40°; Scan step size: 0.02°; Time per step: 1 s). The specific Brunauer-Emmett-Teller (BET) surface area and pore size distribution were measured using a Micrometrics ASAP 2040 instrument at 77 K. High resolution transmission electron microscope (HR-TEM) images were obtained on a JEM-2100F instrument at an accelerating voltage of 200 kV. Solid-state <sup>13</sup>C cross polarization magic angle spinning (<sup>13</sup>C-CP/MAS) NMR spectra were collected on a Bruker Avance III HD 400 spectrometer. X-ray photoelectron spectroscopy (XPS) measurements were performed on a Thermo ESCALAB 250 spectrometer with non-monochromatic Al K $\alpha$  x-rays as the excitation source and C 1s (284.8 eV) as the reference line. Thermal stability was investigated on a DZ-STA200 thermogravimetric analyzer with temperature ranging from 303 to 1073 K under N<sub>2</sub> atmosphere at a heating rate of 10 K min<sup>-1</sup>. Thermogravimetric analysis (TGA) measurements were investigated on a DZ-STA200 thermogravimetric analyzer with temperature ranging from 303 to 1073 K under air atmosphere at a heating rate of 10 K min<sup>-1</sup>. Circular dichroism (CD) spectra were carried out on a JASCO J-1500 spectropolarimeter in the

range of 200-400 nm using a 1 mm path length quartz cell (scan speed: 200 nm min<sup>-1</sup>, band width: 4 nm). Samples were prepared by dispersing them in ethanol.

## 2. Synthetic procedures

### 2.1 Model reaction

#### 2.1.1 Synthesis of methyl-2-phenylquinoline-4-carboxylate

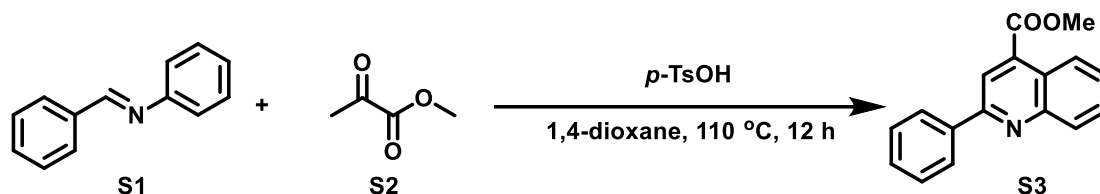

A 10 mL Schlenk tube was charged with *N*-Benzylideneaniline (S1, 38 mg, 0.20 mmol), methyl pyruvate (S2, 41 mg, 0.40 mmol), *p*-TsOH (7 mg, 0.04 mmol), and 2 mL of 1,4-dioxane. The mixture was stirred at 110 °C under an O<sub>2</sub> atmosphere for 12 hours. After cooling, the mixture was concentrated, and then purified by flash column chromatography on silica gel using the eluent (PE : EtOAc = 50 : 1) to yield methyl-2-phenylquinoline-4-carboxylate (S3, 45 mg, 86 %) as a colorless liquid. <sup>1</sup>H NMR (600 MHz, CDCl<sub>3</sub>): δ 8.76 (d, *J* = 8.5 Hz, 1H), 8.41 (s, 1H), 8.24-8.20 (m, 3H), 7.79-7.76 (m, 1H), 7.65-7.62 (m, 1H), 7.56-7.54 (m, 2H), 7.50-7.48 (m, 1H), 4.08 (s, 3H). <sup>13</sup>C NMR (151 MHz, CDCl<sub>3</sub>) δ 166.9, 156.8, 149.3, 138.8, 135.6, 130.3, 130.0, 129.8, 129.0, 127.9, 127.5, 125.4, 124.0, 120.4, 52.8.

#### 2.1.2 Synthesis of L-menthyl pyruvate

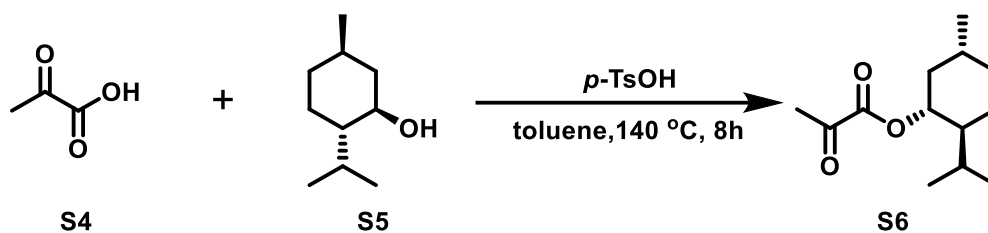

A round-bottom flask was charged with pyruvic acid (S4, 1.76 g, 20 mmol), L-menthol (S5, 3.43 g, 22 mmol), *p*-TsOH (344 mg, 2 mmol), and toluene (90 mL), and the mixture was reacted at 140 °C for 8 hours using a water separator. After cooling, the reaction was quenched by adding saturated NaHCO<sub>3</sub>, and the mixture was then extracted with EtOAc (3 × 50 mL). The combined organic layers were washed with brine, dried over Na<sub>2</sub>SO<sub>4</sub>, and concentrated under vacuum. The resulting residue was then purified by flash column chromatography on silica gel using the eluent (PE :

EtOAc = 20 : 1) to yield product **S6** (2.45 g, 54 %) as a yellow oil. <sup>1</sup>H NMR (600 MHz, CDCl<sub>3</sub>): δ 4.83 (td, *J* = 10.9 Hz, *J* = 4.4 Hz, 1H), 2.46 (s, 3H), 2.03-2.00 (m, 1H), 1.88-1.83 (m, 1H), 1.73-1.68 (m, 2H), 1.55-1.48 (m, 2H), 1.33-1.23 (m, 2H), 1.14-1.06 (m, 1H), 0.92 (d, *J* = 6.5 Hz, 3H), 0.90 (d, *J* = 7.0 Hz, 3H), 0.76 (d, *J* = 7.0 Hz, 3H). <sup>13</sup>C NMR (151 MHz, CDCl<sub>3</sub>) δ 192.4, 160.6, 74.7, 40.4, 34.0, 31.4, 26.8, 26.2, 23.3, 21.9, 20.7, 16.2.

### 2.1.3 Synthesis of L-menthyl-2-phenylquinoline-4-carboxylate

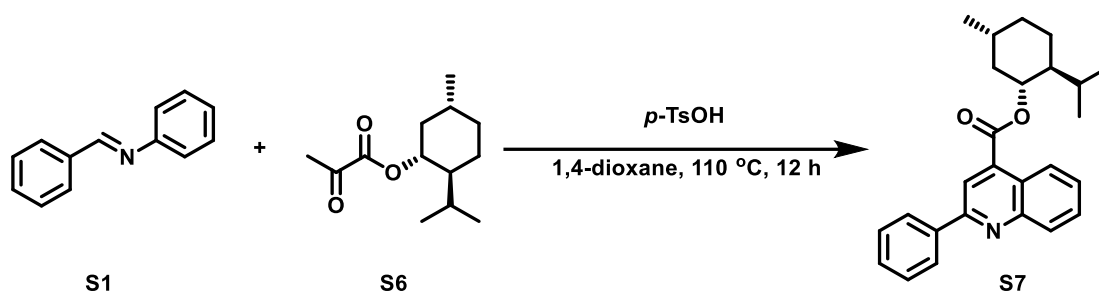

A 10 mL Schlenk tube was charged with *N*-Benzylideneaniline (**S1**, 38 mg, 0.20 mmol), **S6** (155 mg, 0.40 mmol), *p*-TsOH (7 mg, 0.04 mmol), and 2 mL of 1,4-dioxane. The mixture was stirred at 110 °C under an O<sub>2</sub> atmosphere for 12 hours. After cooling, the mixture was concentrated, and then purified by flash column chromatography on silica gel using the eluent (PE : EtOAc = 50 : 1) to yield L-menthyl-2-phenylquinoline-4-carboxylate (**S7**, 56.8 mg, 73 %) as a colorless liquid. <sup>1</sup>H NMR (600 MHz, CDCl<sub>3</sub>): δ 8.73 (d, *J* = 9.3 Hz, 1H), 8.35 (s, 1H), 8.25 (d, *J* = 8.4 Hz, 1H), 8.21 (m, 2H), 7.79-7.76 (m, 1H), 7.65-7.62 (m, 1H), 7.58-7.55 (m, 2H), 7.51-7.49 (m, 1H), 5.17 (td, *J* = 11.0 Hz, *J* = 4.5 Hz, 1H), 2.29-2.25 (m, 1H), 2.04-1.99 (m, 1H), 1.81-1.76 (m, 2H), 1.66-1.61 (m, 2H), 1.30-1.16 (m, 3H), 1.00 (d, *J* = 6.6 Hz, 3H), 0.96 (d, *J* = 7.0 Hz, 3H), 0.89 (d, *J* = 7.0 Hz, 3H). <sup>13</sup>C NMR (151 MHz, CDCl<sub>3</sub>) δ 166.1, 156.8, 149.3, 139.0, 136.7, 130.3, 129.9, 129.7, 129.0, 127.7, 127.5, 125.4, 124.1, 119.9, 47.2, 41.0, 34.2, 31.6, 26.6, 23.5, 22.1, 20.8, 16.4.

## 2.2 Synthesis of Im-COFs

### 2.2.1 Synthesis of Im-COF<sub>F3</sub>

1,3,6,8-tetrakis(4-aminophenyl)pyrene (Tappyl) (29 mg, 0.05 mmol) and terephthalaldehyde (14 mg, 0.10 mmol) were sequentially added to a Pyrex glass tube

along with a mixed solution of *o*-DCB (0.7 mL) and *n*-BuOH (0.7 mL). The tube was then sonicated for 15 minutes. After adding aqueous acetic acid (6 M, 0.1 mL), the glass tube underwent three freeze-pump-thaw cycles to degas before being sealed under vacuum. Subsequently, the sealed tube was heated in an oven at 120 °C for 3 days. Upon cooling, the resulting suspension was centrifuged to separate the solid material, which was then washed repeatedly with THF and MeOH until the solvent became colorless. The final product, **Im-COF<sub>F3</sub>**, was obtained as a yellow powder (35 mg, 91 % yield) after being dried under vacuum at 60 °C.

### 2.2.2 Synthesis of Im-COF<sub>G1</sub>

1,3,5-Tris(4-aminophenyl)benzene (18 mg, 0.05 mmol) and 2,5-Dimethoxy-1,4-benzenedicarboxaldehyde (15 mg, 0.075 mmol) were sequentially added to a Pyrex glass tube along with a mixed solution of Mesitylene (0.6 mL) and 1,4-Dioxane (0.6 mL). The tube was then sonicated for 15 minutes. After adding aqueous acetic acid (6 M, 0.1 mL), the glass tube underwent three freeze-pump-thaw cycles to degas before being sealed under vacuum. Subsequently, the sealed tube was heated in an oven at 120 °C for 3 days. Upon cooling, the resulting suspension was centrifuged to separate the solid material, which was then washed repeatedly with THF and MeOH until the solvent became colorless. The final product, **Im-COF<sub>G1</sub>**, was obtained as a yellow powder (26 mg, 89 % yield) after being dried under vacuum at 60 °C.

## 2.3 Synthesis of QCE-COFs

### 2.3.1 Typical synthetic procedure of QCE-COF<sub>F3</sub>-Me

A 10 mL Schlenk tube was charged with **Im-COF<sub>F3</sub>** (38 mg, theoretically containing 0.20 mmol of imine linkages), methyl pyruvate (**S2**, 51 mg, 0.5 mmol), *p*-TsOH (7 mg, 0.04 mmol), and 2 mL of 1,4-dioxane. The mixture was stirred at 110 °C under an O<sub>2</sub> atmosphere for 36 hours. After cooling, the solid was filtered under reduced pressure and washed sequentially with CH<sub>3</sub>OH, aqueous ammonia, water, and CH<sub>3</sub>OH. The final product, **QCE-COF<sub>F3</sub>-Me**, was obtained as an orange powder (47 mg, 85 % yield) after being dried under vacuum at 60 °C.

**QCE-COF<sub>F3</sub>-Et**, **QCE-COF<sub>G1</sub>-Me** and **QCE-COF<sub>G1</sub>-Et** were synthesized similarly following the procedure for the synthesis of **QCE-COF<sub>F3</sub>-Me**.

### 2.3.2 Synthesis of **QCE-COF<sub>F3</sub>-Men**

A 10 mL Schlenk tube was charged with **Im-COF<sub>F3</sub>** (38 mg), L-menthyl pyruvate (**S7**, 113 mg, 0.5 mmol), *p*-TsOH (7 mg, 0.04 mmol), and 2 mL of 1,4-dioxane. The mixture was stirred at 110 °C under an O<sub>2</sub> atmosphere for 72 hours. After cooling, the solid was filtered under reduced pressure and washed sequentially with CH<sub>3</sub>OH, aqueous ammonia, water, and CH<sub>3</sub>OH. The final product, **QCE-COF<sub>F3</sub>-Men**, was obtained as an orange powder (50 mg, 62 % yield) after being dried under vacuum at 60 °C.



### 3. Characterization of COFs

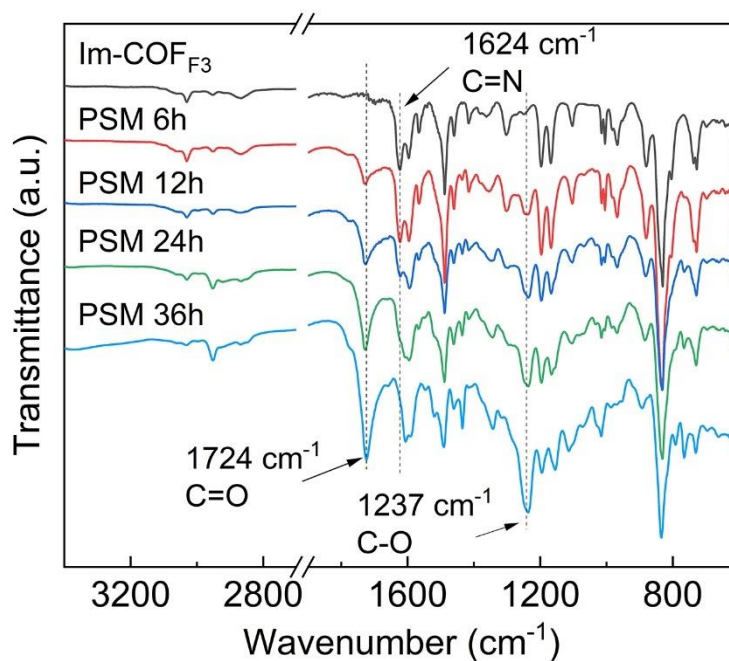

**Fig. S1** FT-IR monitoring of the synthesis of QCE-COF<sub>F3</sub>-Me.

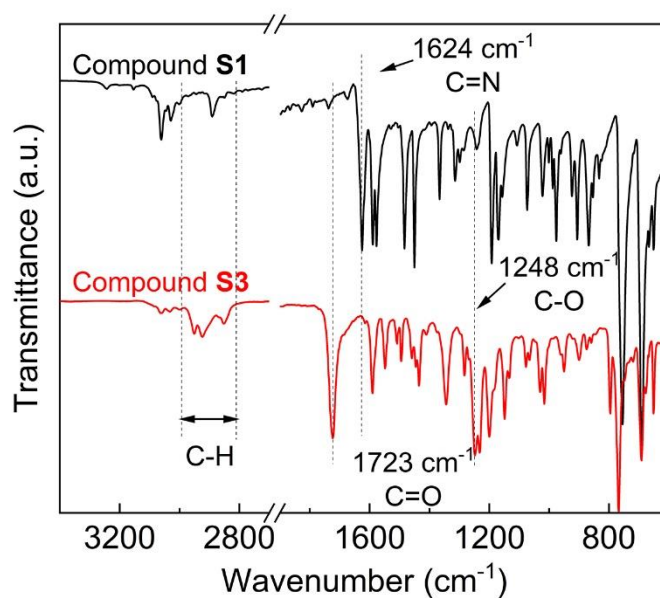

**Fig. S2** FT-IR spectra of model reactant S1 and model product S3 in the model reaction.

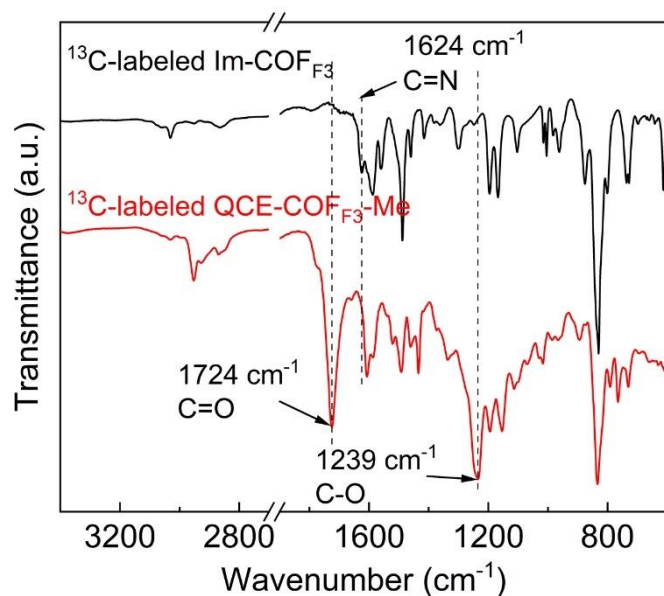

**Fig. S3** FT-IR spectra of  $^{13}\text{C}$  labeled  $\text{Im-COF}_{\text{F}_3}$  and  $\text{QCE-COF}_{\text{F}_3}\text{-Me}$ .

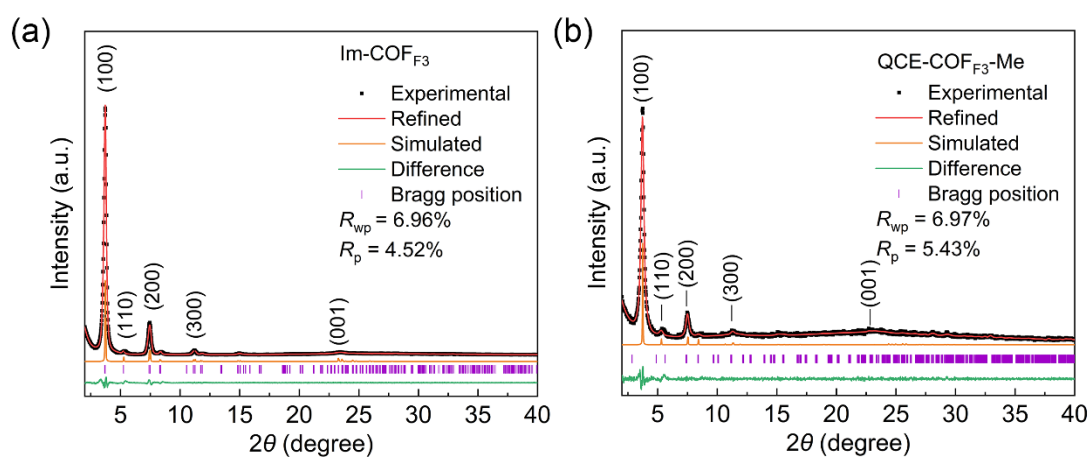

**Fig. S4** PXRD patterns of  $\text{Im-COF}_{\text{F}_3}$  (a) and  $\text{QCE-COF}_{\text{F}_3}\text{-Me}$  (b).

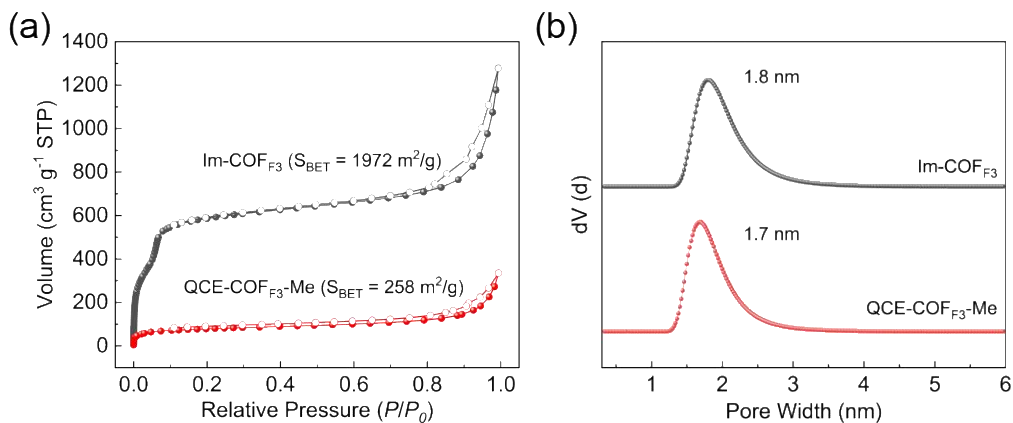

**Fig. S5** (a)  $\text{N}_2$  sorption isotherm curves. (b) Pore size distribution.

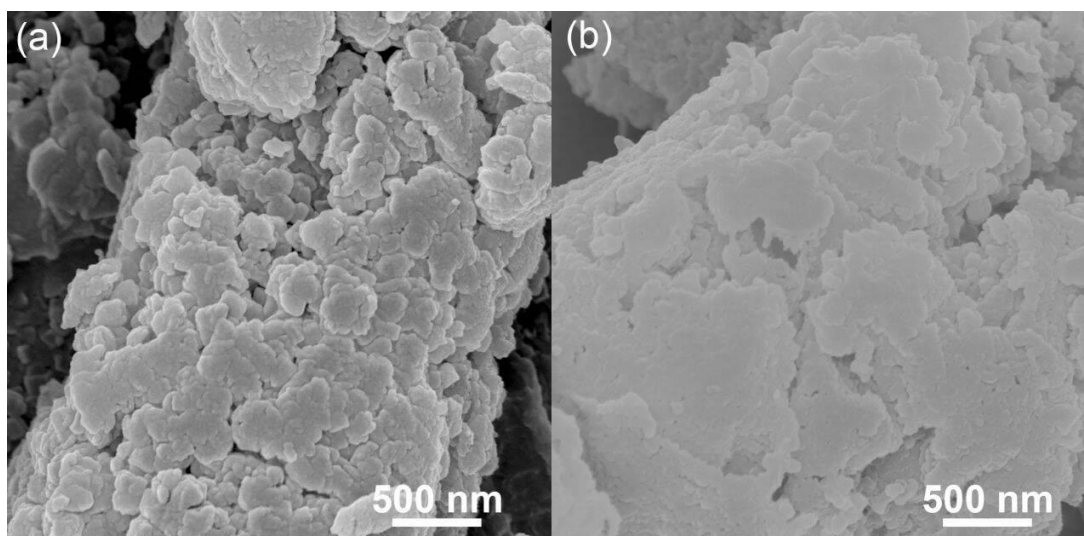

**Fig. S6** SEM images of (a) **Im-COF<sub>F3</sub>** and (b) **QCE-COF<sub>F3</sub>-Me**.

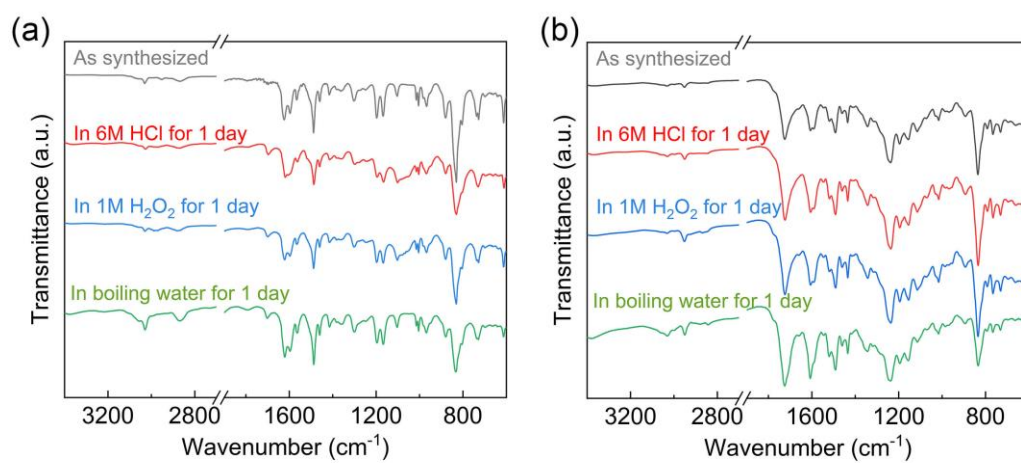

**Fig. S7** FT-IR spectra of **Im-COF<sub>F3</sub>** (a) and **QCE-COF<sub>F3</sub>-Me** (b) before and after treatment with 6M HCl, 1M H<sub>2</sub>O<sub>2</sub> and 100 °C H<sub>2</sub>O for 1 day.

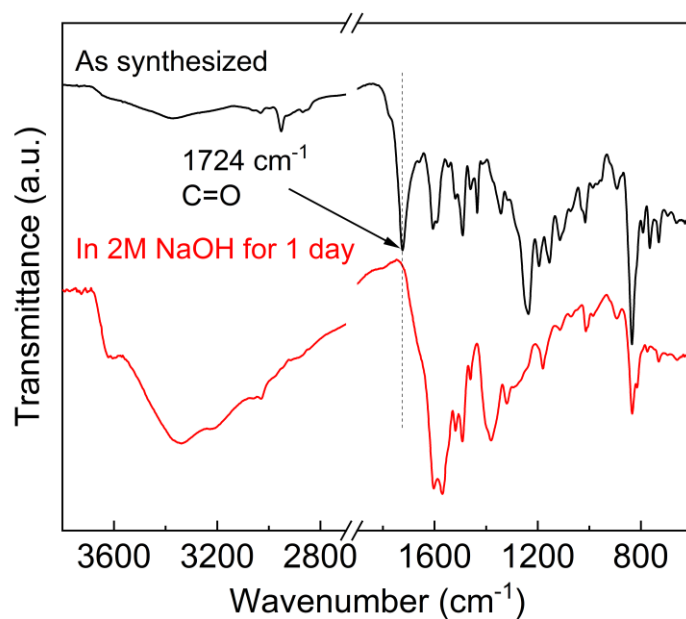

**Fig. S8** FT-IR spectra of **QCE-COF<sub>F3</sub>-Me** before and after treatment with 2M NaOH for 1 day.

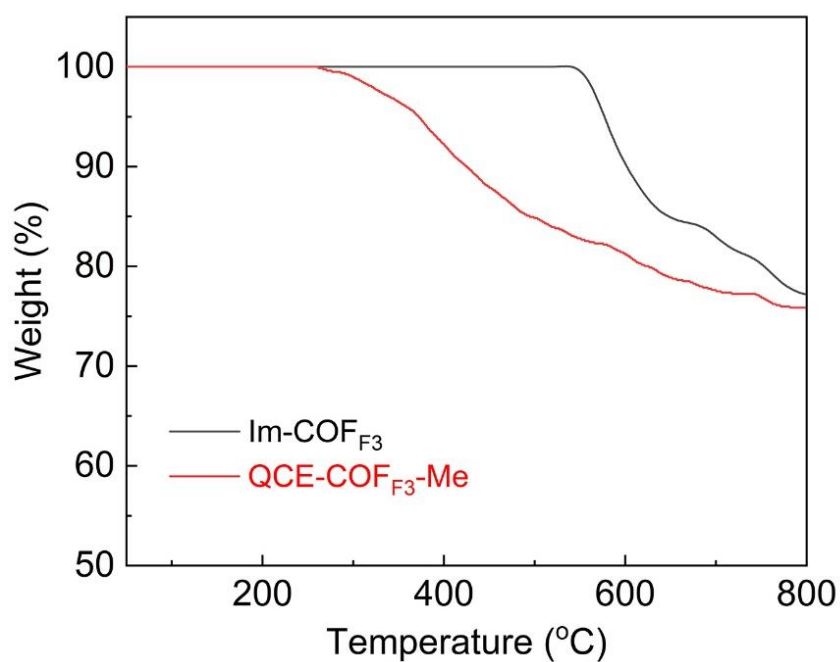

**Fig. S9** Thermal stability of **Im-COF<sub>F3</sub>** and **QCE-COF<sub>F3</sub>-Me** under N<sub>2</sub> atmosphere.

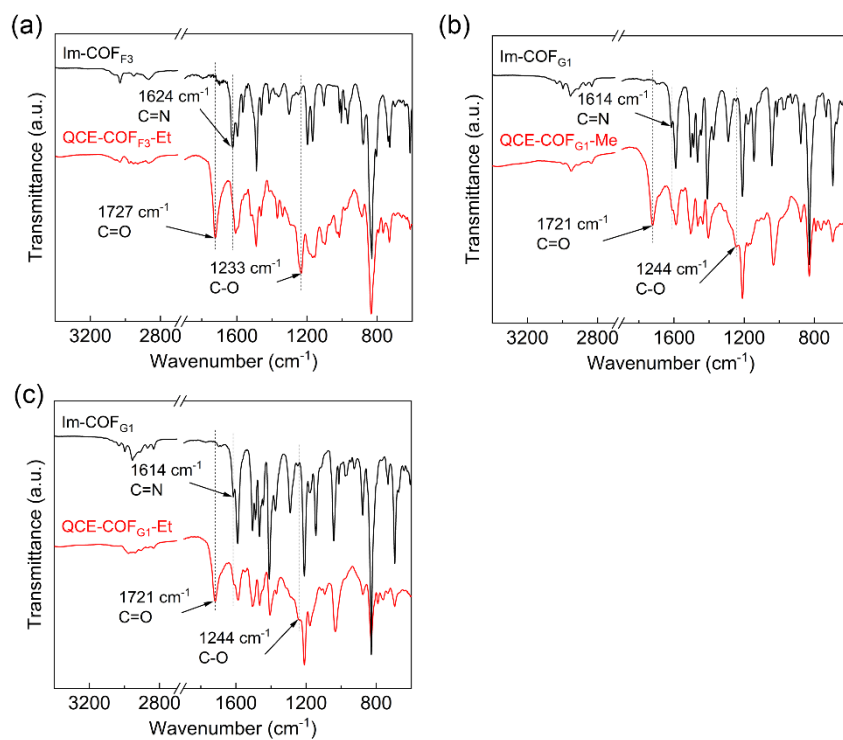

**Fig. S10** FT-IR spectra. (a) **Im-COF<sub>F3</sub>** and **QCE-COF<sub>F3</sub>-Et**. (b) **Im-COF<sub>G1</sub>** and **QCE-COF<sub>G1</sub>-Me**. (c) **Im-COF<sub>G1</sub>** and **QCE-COF<sub>G1</sub>-Et**.

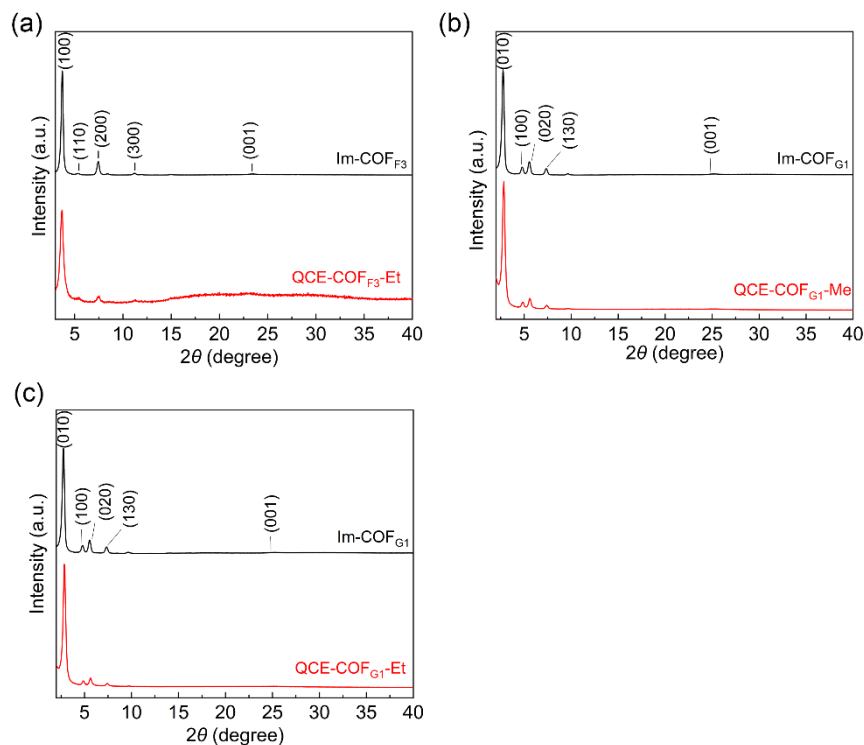

**Fig. S11** Experimental PXRD patterns. (a) **Im-COF<sub>F3</sub>** and **QCE-COF<sub>F3</sub>-Et**. (b) **Im-COF<sub>G1</sub>** and **QCE-COF<sub>G1</sub>-Me**. (c) **Im-COF<sub>G1</sub>** and **QCE-COF<sub>G1</sub>-Et**.

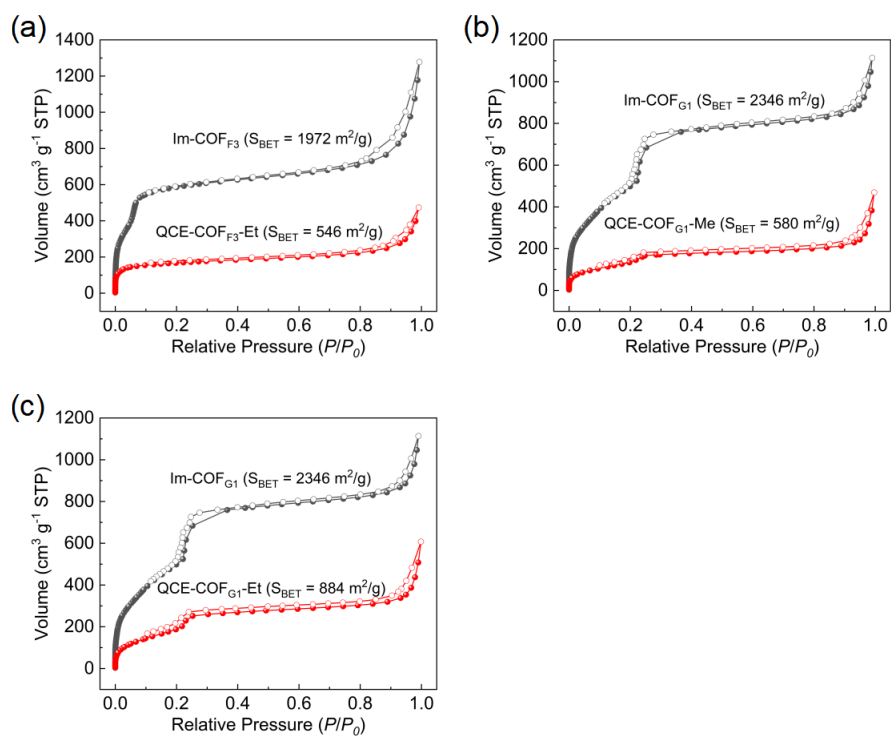

**Fig. S12** N<sub>2</sub> sorption isotherm curves.

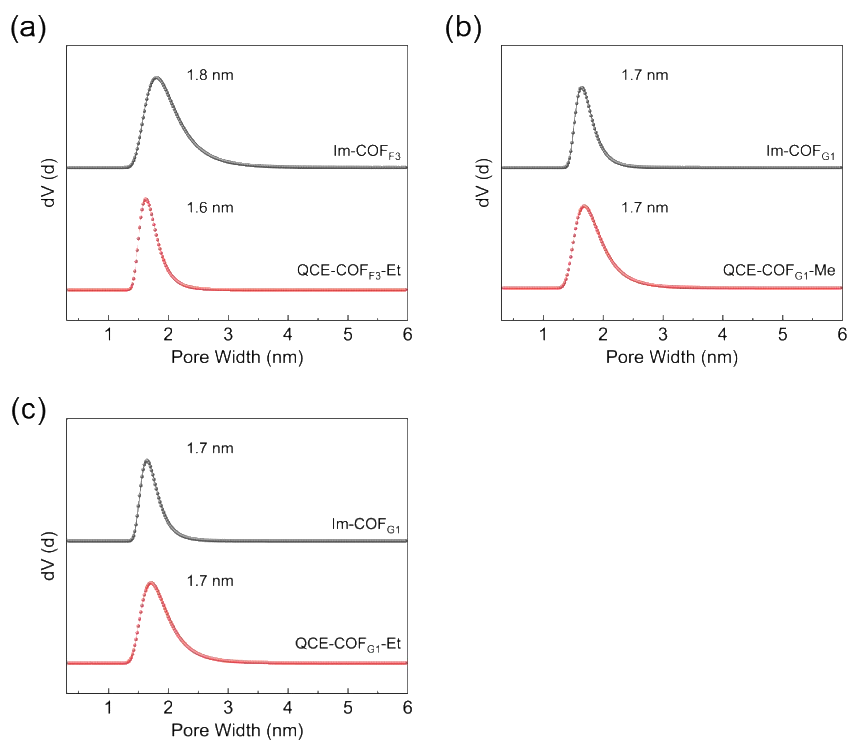

**Fig. S13** Pore size distribution.

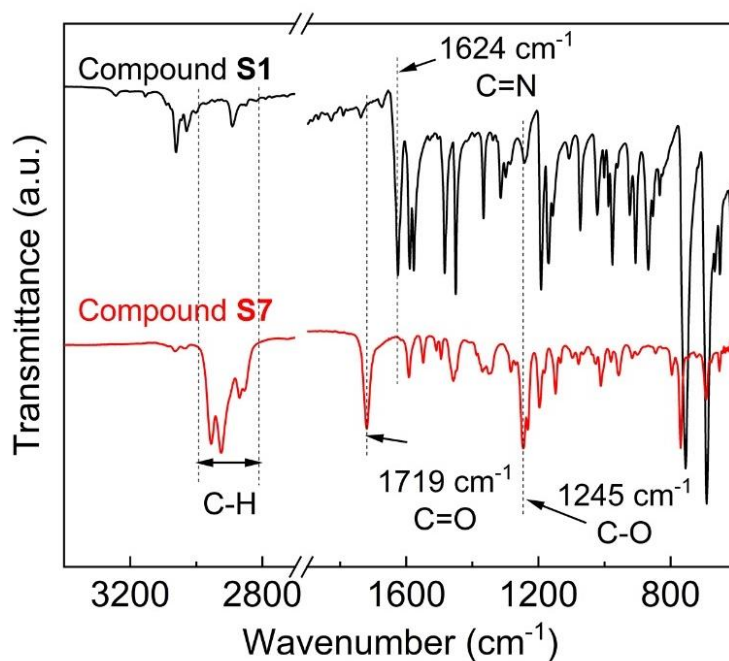

**Fig. S14** FT-IR spectra of model reactant **S1** and model product **S7** in the model reaction.

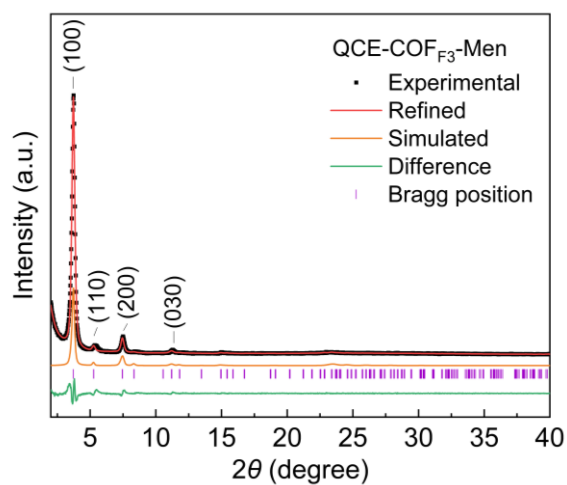

**Fig. S15** PXRD patterns of **QCE-COF<sub>3</sub>-Men**.

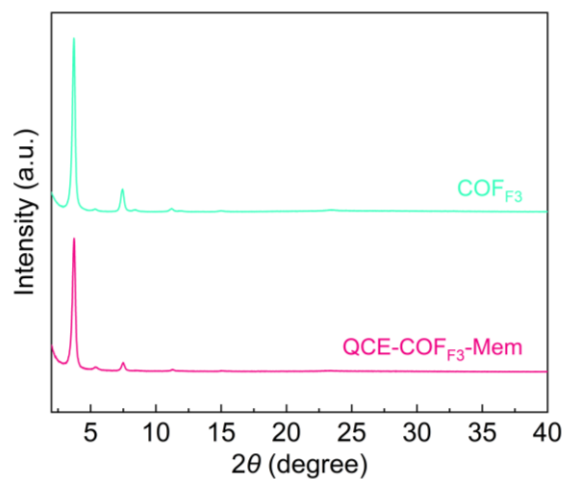

**Fig. S16** Experimental PXRD patterns.

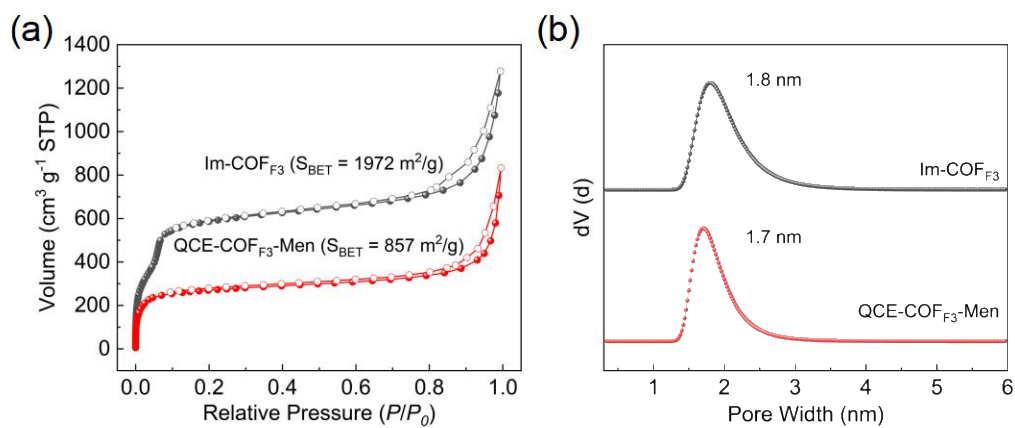

**Fig. S17** (a)  $N_2$  sorption isotherm curves. (b) Pore size distribution.

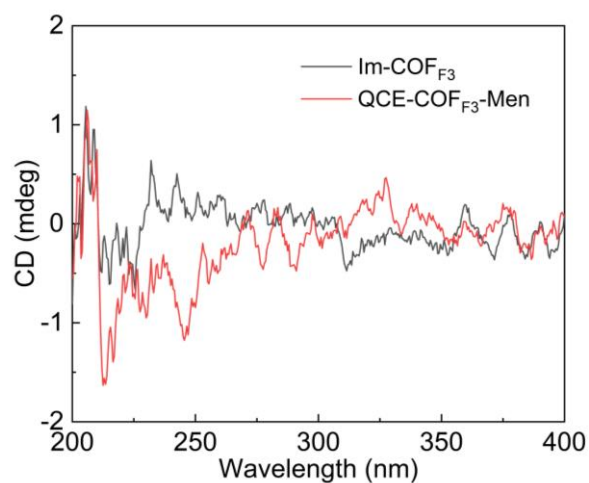

**Fig. S18** CD spectra of **Im-COF<sub>F3</sub>** and **QCE-COF<sub>F3</sub>-Men**.



## 4. Copies of NMR spectra

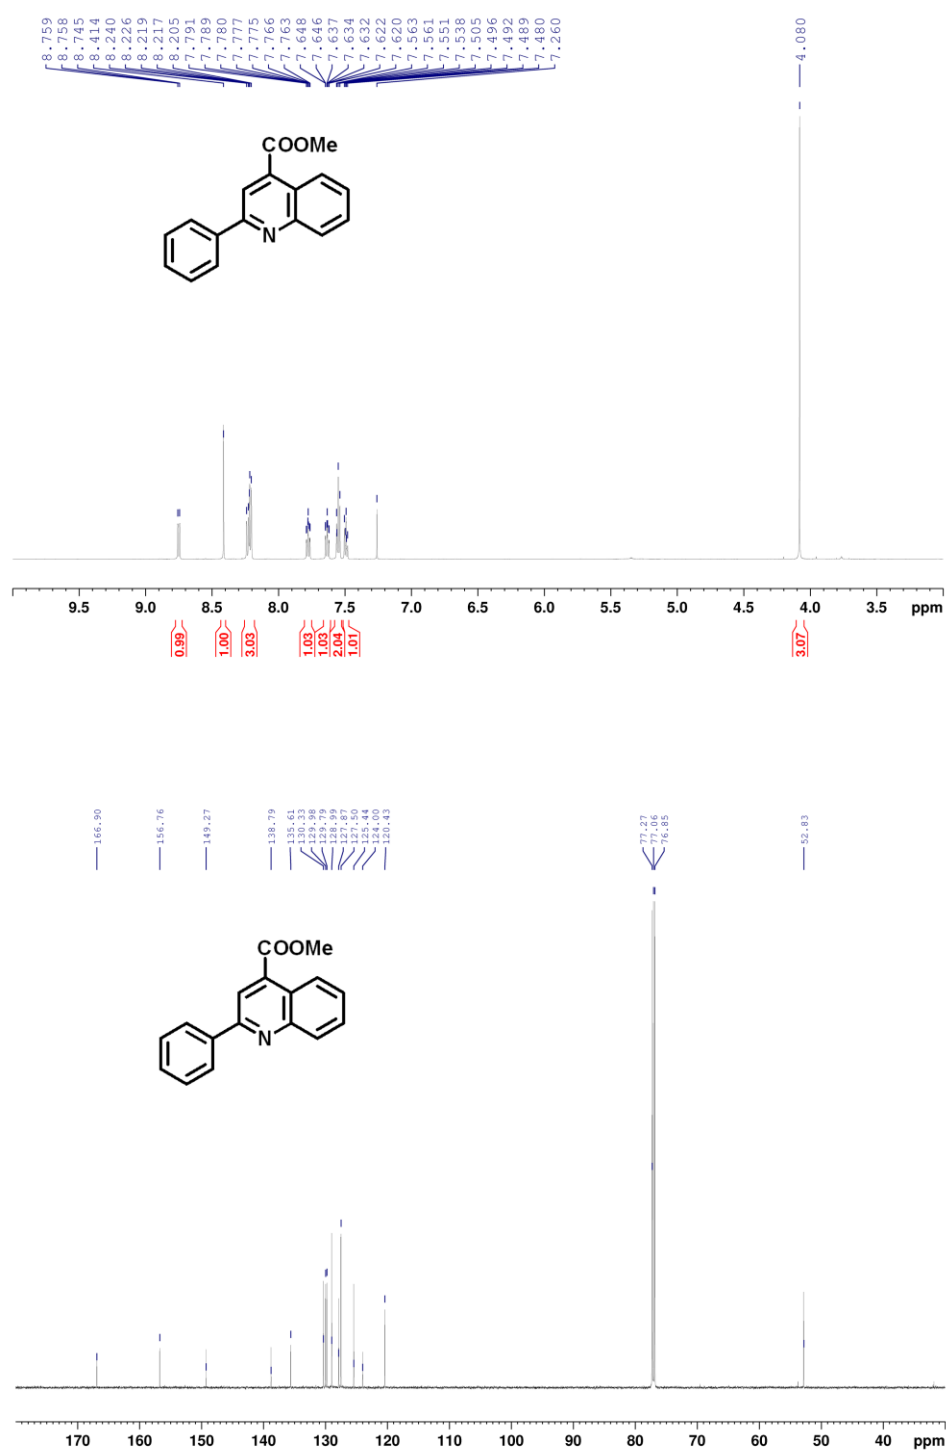

Fig. S19 <sup>1</sup>H NMR and <sup>13</sup>C NMR spectra of methyl-2-phenylquinoline-4-carboxylate.

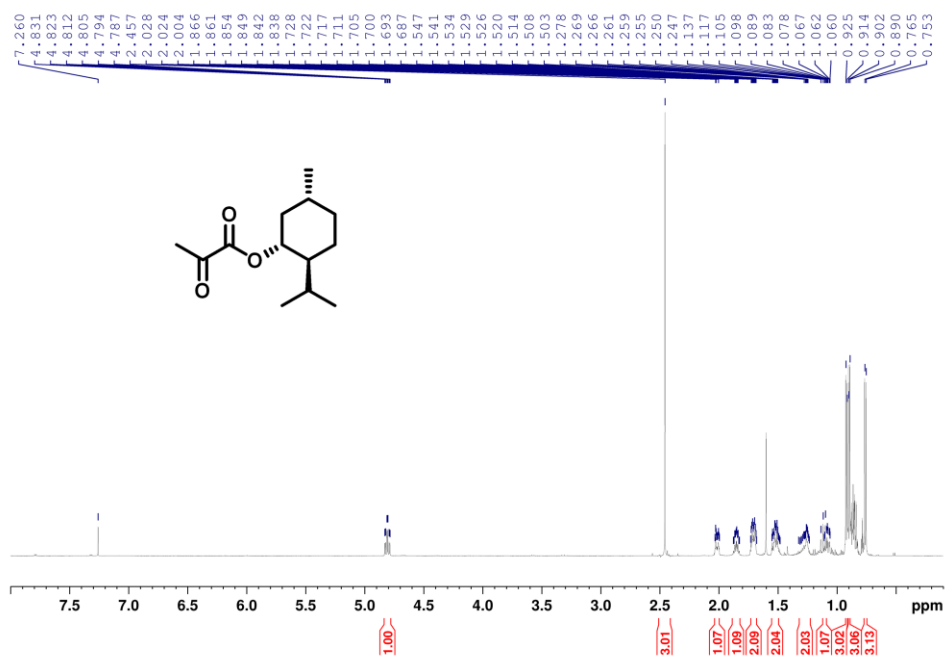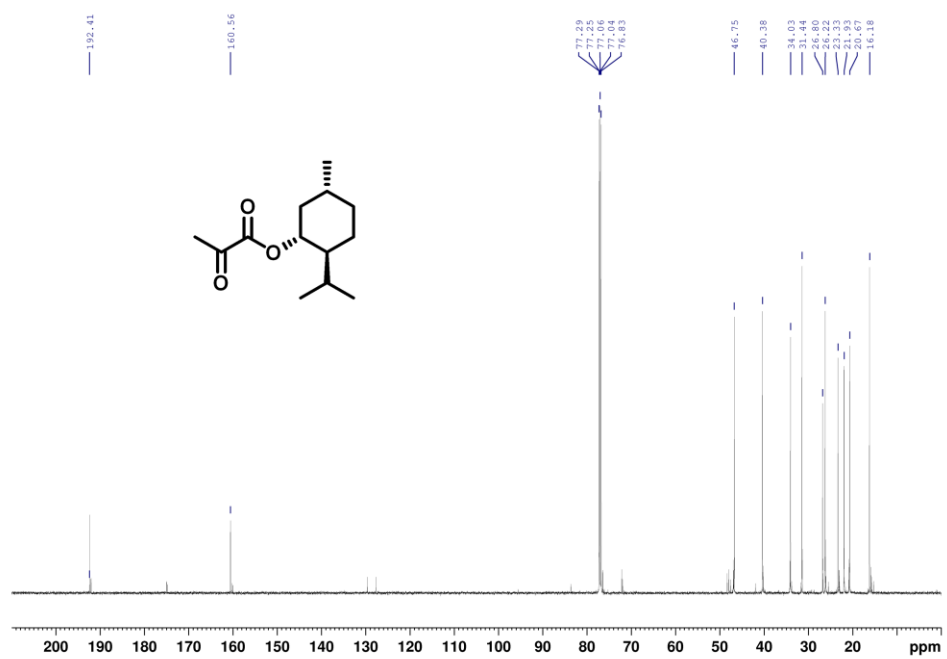

Fig. S20 <sup>1</sup>H NMR and <sup>13</sup>C NMR spectra of L-menthyl pyruvate.

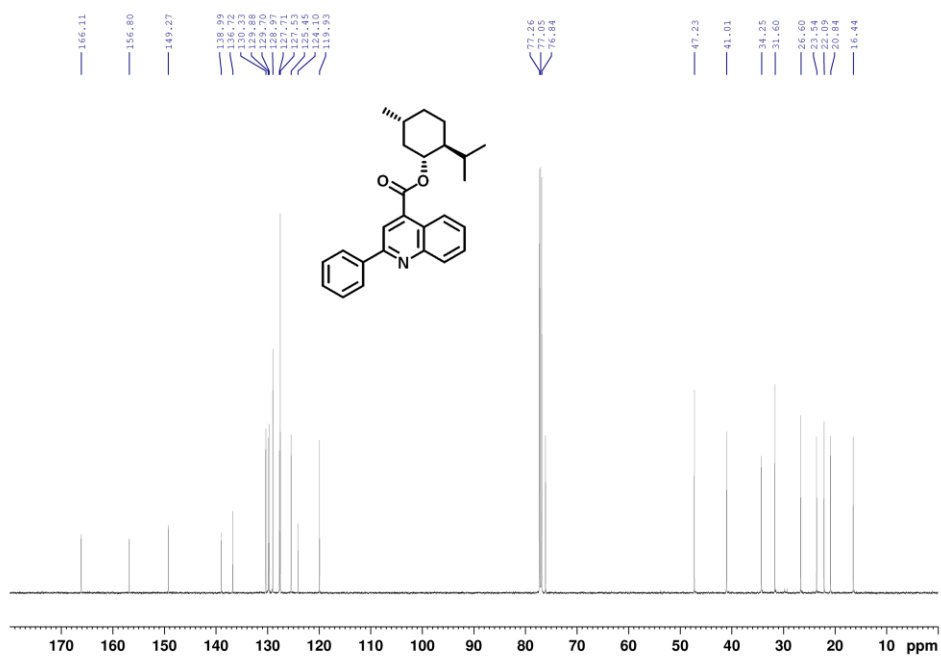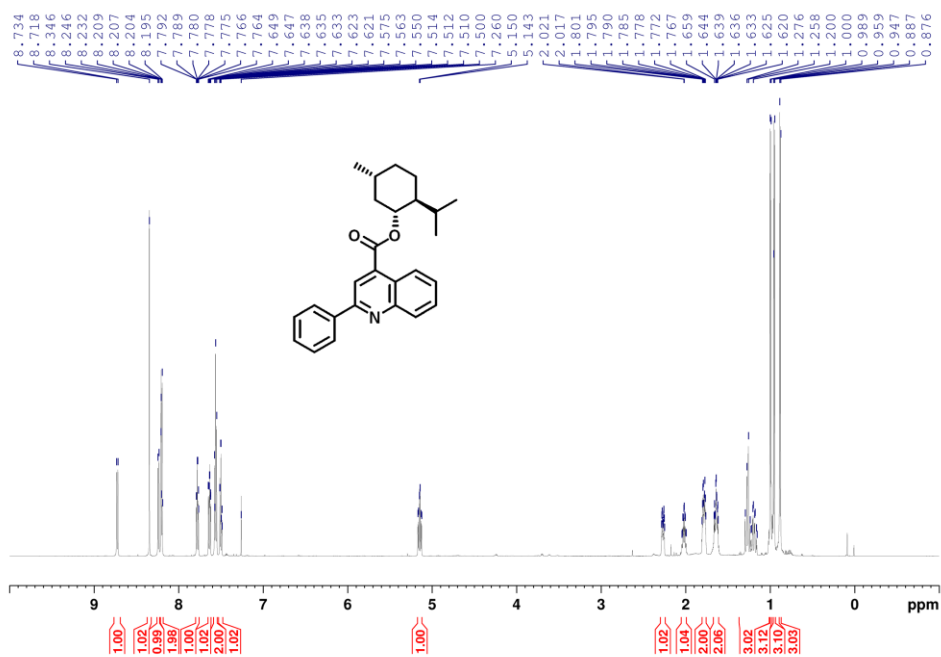

**Fig. S21** <sup>1</sup>H NMR and <sup>13</sup>C NMR spectra of L-menthyl-2-phenylquinoline-4-carboxylate.

## 5. References

1. Zhao, X.; Pang, H.; Huang, D.; Liu, G.; Hu, J.; Xiang, Y. *Angew. Chem. Int. Ed.* 2022, **61**, e202208833.
2. Zhu, Y.; Huang, D.; Wang, W.; Liu, G.; Ding, C.; Xiang, Y. *Angew. Chem. Int. Ed.* 2024, **63**, e202319909.
